# Supplementary material for: Identification of variants and therapeutic epitopes in HPV-33/HPV-58 E6 and E7 in Southwest China
Source: Springer Nature journal article supplement (doi:10.1186/s12985-019-1168-y), 2019-05-28
Supplement: MOESM2 [file 16756068]

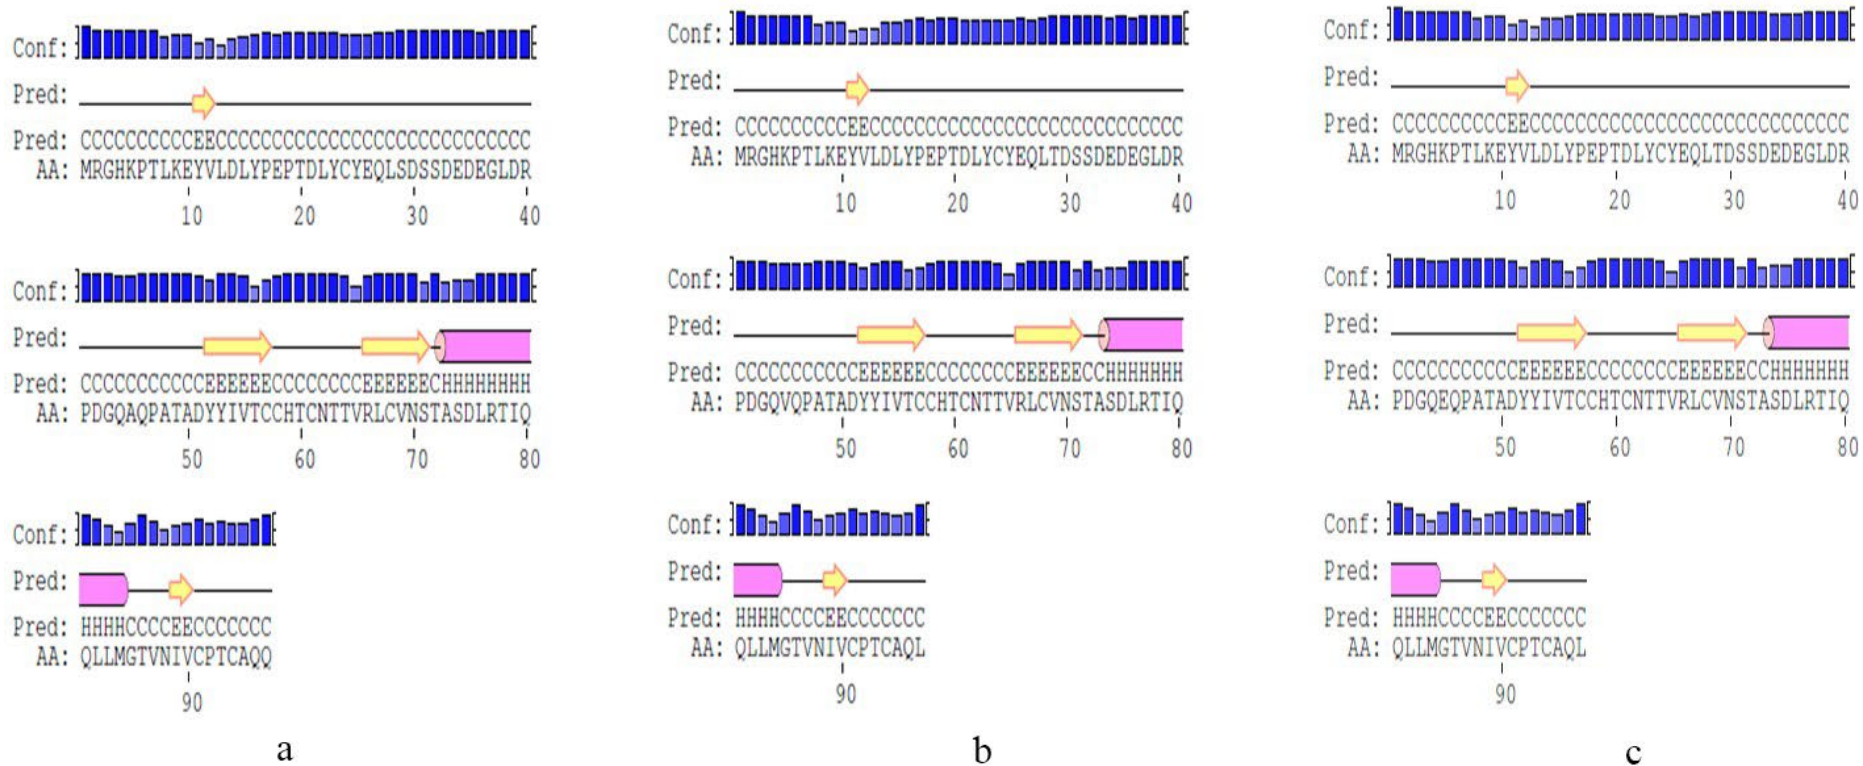

**Figure S2. Secondary structure prediction of HPV-33 E7 reference and variant sequence**

Note: a: secondary structure prediction model of HPV-33 E7 reference sequence; b: secondary structure prediction model of HPV-33 E7 variant-1 sequence; c: secondary structure prediction model of HPV-33 E7 variant-2 sequence

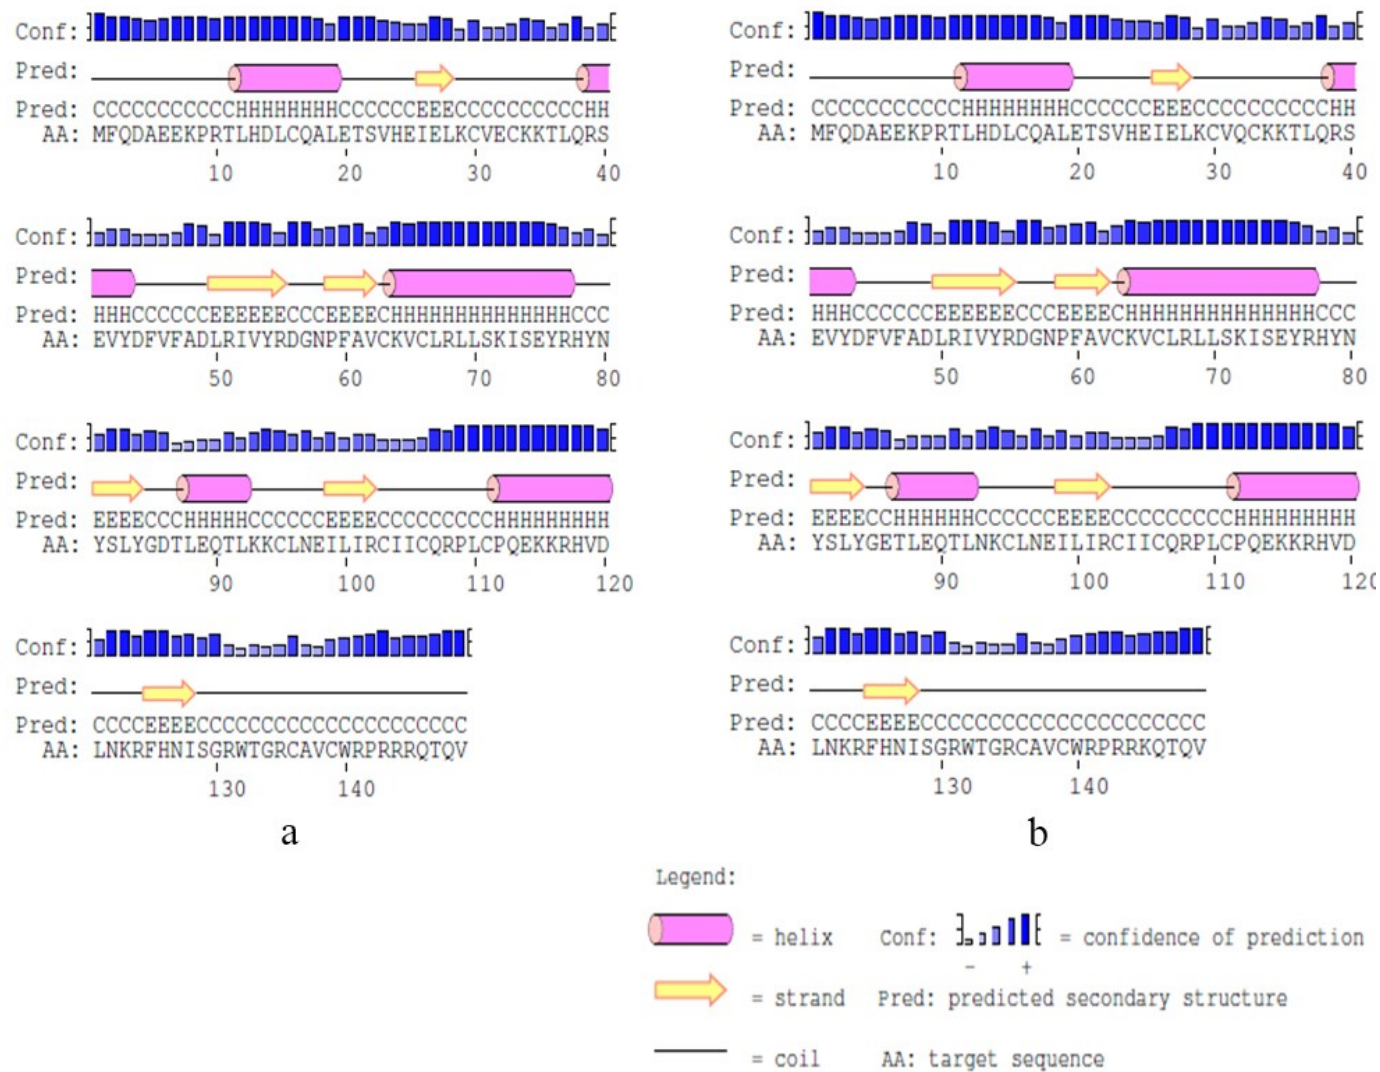

**Figure S3. Secondary structure prediction of HPV-58 E6 reference and variant sequence**

Note: a: secondary structure prediction model of HPV-58 E6 reference sequence; b: secondary structure prediction model of HPV-58 E6 variant sequence



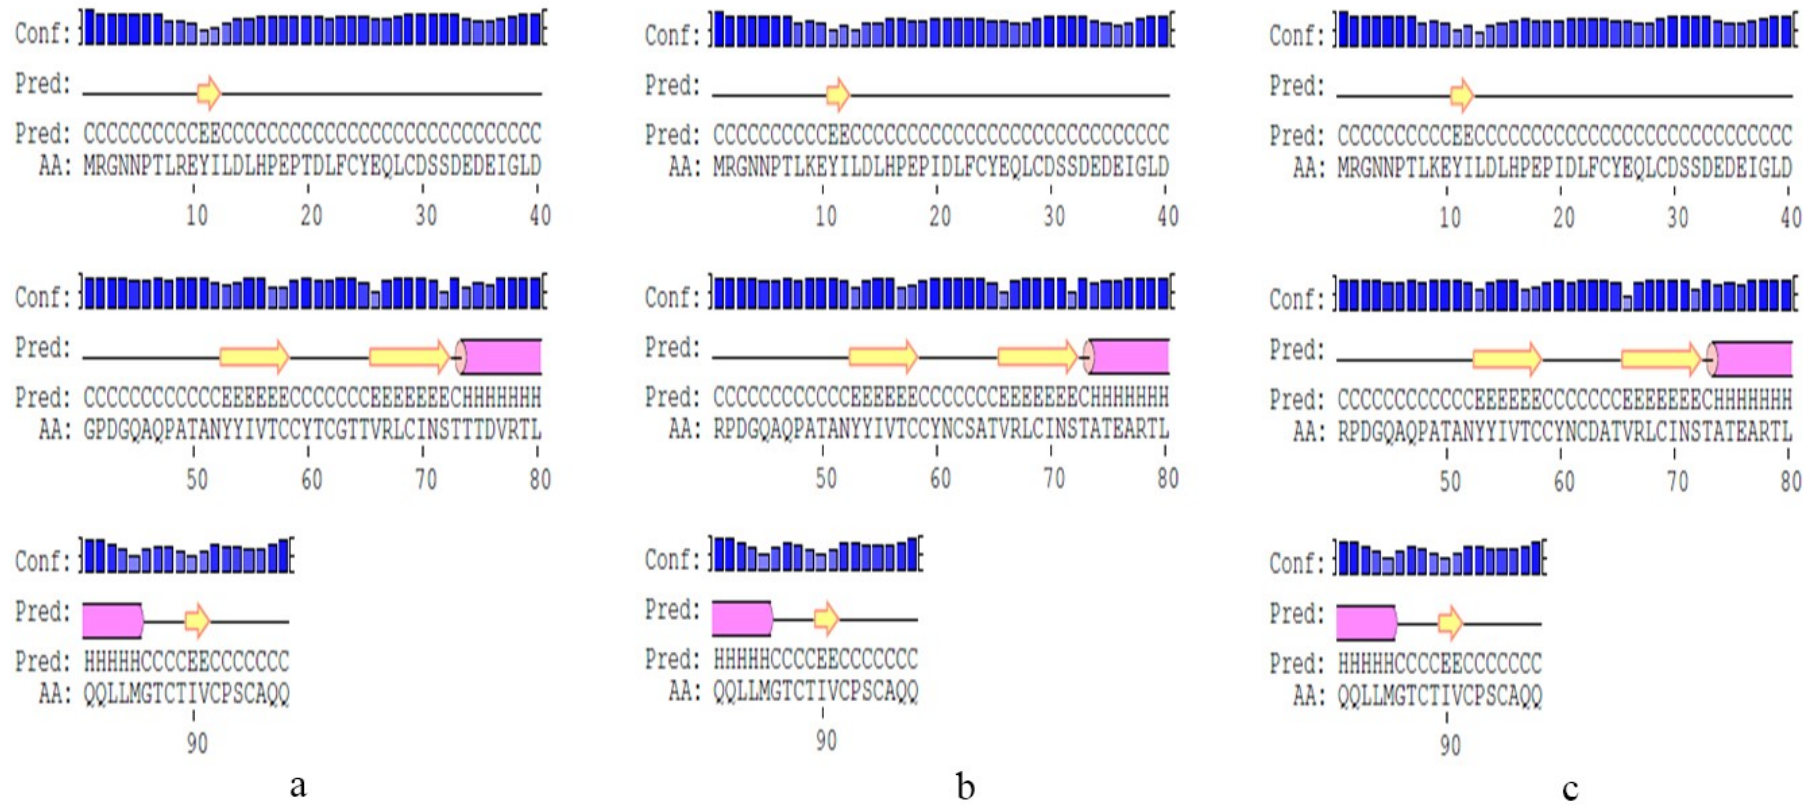

**Figure S4. Secondary structure prediction of HPV-58 E7 reference and variant sequence**

Note: a: secondary structure prediction model of HPV-58 E7 reference sequence; b: secondary structure prediction model of HPV-58 E7 variant-1 sequence; c: secondary structure prediction model of HPV-58 E7 variant-2 sequence
