# Supplementary material for: Identification of variants and therapeutic epitopes in HPV-33/HPV-58 E6 and E7 in Southwest China
Source: Virol J. 2019 May 28;16:72. doi: 10.1186/s12985-019-1168-y (PMC6537359; doi:10.1186/s12985-019-1168-y)
Supplement: Supplementary file 3 — Table S5. The diversity of predicted binders of HPV-33 E6 for HLA-I alleles between reference and variant sequences; Table S6. The diversity of predicted binders of HPV-33 E7 for HLA-I alleles between reference and variant sequences; Table S7. Predicted epitopes binders for HLA-II alleles of HPV-33 E6; Table S8. Predicted epitopes binders for HLA-II alleles of HPV-33 E7. (XLSX 42 kb) [file 12985_2019_1168_MOESM3_ESM.xlsx]

## Sheet: Table S5
Table S5. The diversity of predicted binders of HPV-33 E6 for HLA-I alleles between reference and variant sequences
HPV-33-E6 reference sequence epitopes for HLA-I							HPV-33-E6 variant sequences epitopes for HLA-I
Allele	Start	End	Length	Peptide	Method used	Percentile rank	Allele	Start	End	Length	Peptide	Method used	Percentile rank
HLA-A*11:01	82	93	12	SVYGNTLEQTVK	ann	0.1	HLA-B*40:01	16	28	13	CQALETTIHNIEL	ann	0.1
HLA-B*40:01	16	28	13	CQALETTIHNIEL	ann	0.1	HLA-B*40:01	18	28	11	ALETTIHNIEL	ann	0.1
HLA-B*40:01	18	28	11	ALETTIHNIEL	ann	0.1	HLA-B*46:01	41	54	14	EVYDFAFADLTVVY	ann	0.1
HLA-B*46:01	41	54	14	EVYDFAFADLTVVY	ann	0.1	HLA-B*46:01	42	54	13	VYDFAFADLTVVY	ann	0.1
HLA-B*46:01	42	54	13	VYDFAFADLTVVY	ann	0.1	HLA-B*46:01	42	55	14	VYDFAFADLTVVYR	ann	0.1
HLA-B*46:01	42	55	14	VYDFAFADLTVVYR	ann	0.1	HLA-B*46:01	43	54	12	YDFAFADLTVVY	ann	0.1
HLA-B*46:01	43	54	12	YDFAFADLTVVY	ann	0.1	HLA-B*46:01	43	55	13	YDFAFADLTVVYR	ann	0.1
HLA-B*46:01	43	55	13	YDFAFADLTVVYR	ann	0.1	HLA-B*46:01	43	56	14	YDFAFADLTVVYRE	ann	0.1
HLA-B*46:01	43	56	14	YDFAFADLTVVYRE	ann	0.1	HLA-B*46:01	44	53	10	DFAFADLTVV	ann	0.1
HLA-B*46:01	44	53	10	DFAFADLTVV	ann	0.1	HLA-B*46:01	44	54	11	DFAFADLTVVY	ann	0.1
HLA-B*46:01	44	54	11	DFAFADLTVVY	ann	0.1	HLA-B*46:01	44	55	12	DFAFADLTVVYR	ann	0.1
HLA-B*46:01	44	55	12	DFAFADLTVVYR	ann	0.1	HLA-B*46:01	44	56	13	DFAFADLTVVYRE	ann	0.1
HLA-B*46:01	44	56	13	DFAFADLTVVYRE	ann	0.1	HLA-B*46:01	44	57	14	DFAFADLTVVYREG	ann	0.1
HLA-B*46:01	44	57	14	DFAFADLTVVYREG	ann	0.1	HLA-B*46:01	45	54	10	FAFADLTVVY	ann	0.1
HLA-B*46:01	45	54	10	FAFADLTVVY	ann	0.1	HLA-B*46:01	45	55	11	FAFADLTVVYR	ann	0.1
HLA-B*46:01	45	55	11	FAFADLTVVYR	ann	0.1	HLA-B*46:01	45	56	12	FAFADLTVVYRE	ann	0.1
HLA-B*46:01	45	56	12	FAFADLTVVYRE	ann	0.1	HLA-B*46:01	45	57	13	FAFADLTVVYREG	ann	0.1
HLA-B*46:01	45	57	13	FAFADLTVVYREG	ann	0.1	HLA-B*46:01	45	58	14	FAFADLTVVYREGN	ann	0.1
HLA-B*46:01	45	58	14	FAFADLTVVYREGN	ann	0.1	HLA-B*46:01	47	54	8	FADLTVVY	ann	0.1
HLA-B*46:01	47	54	8	FADLTVVY	ann	0.1	HLA-C*03:02	47	54	8	FADLTVVY	netmhcpan	0.1
HLA-C*03:02	47	54	8	FADLTVVY	netmhcpan	0.1	HLA-B*46:01	45	53	9	FAFADLTVV	Consensus (ann/smm)	0.15
HLA-B*46:01	45	53	9	FAFADLTVV	Consensus (ann/smm)	0.15	HLA-A*24:02	77	88	12	RHYNYSVYGHTL	ann	0.2
HLA-A*33:03	126	135	10	HNISGRWAGR	netmhcpan	0.2	HLA-A*33:03	126	135	10	HNISGRWAGR	netmhcpan	0.2
HLA-B*13:01	43	50	8	YDFAFADL	netmhcpan	0.2	HLA-B*13:01	43	50	8	YDFAFADL	netmhcpan	0.2
HLA-B*46:01	43	53	11	YDFAFADLTVV	ann	0.2	HLA-B*46:01	43	53	11	YDFAFADLTVV	ann	0.2
HLA-B*46:01	45	52	8	FAFADLTV	ann	0.2	HLA-B*46:01	45	52	8	FAFADLTV	ann	0.2
HLA-B*46:01	69	76	8	FLSKISEY	ann	0.2	HLA-B*46:01	69	76	8	FLSKITEY	ann	0.2
HLA-C*03:02	41	54	14	EVYDFAFADLTVVY	netmhcpan	0.2	HLA-C*03:02	41	54	14	EVYDFAFADLTVVY	netmhcpan	0.2
HLA-C*03:02	42	54	13	VYDFAFADLTVVY	netmhcpan	0.2	HLA-C*03:02	42	54	13	VYDFAFADLTVVY	netmhcpan	0.2
HLA-C*03:02	43	54	12	YDFAFADLTVVY	netmhcpan	0.2	HLA-C*03:02	43	54	12	YDFAFADLTVVY	netmhcpan	0.2
HLA-C*03:02	44	54	11	DFAFADLTVVY	netmhcpan	0.2	HLA-C*03:02	44	54	11	DFAFADLTVVY	netmhcpan	0.2
HLA-C*03:02	45	52	8	FAFADLTV	netmhcpan	0.2	HLA-C*03:02	45	52	8	FAFADLTV	netmhcpan	0.2
HLA-C*03:02	45	53	9	FAFADLTVV	netmhcpan	0.2	HLA-C*03:02	45	53	9	FAFADLTVV	netmhcpan	0.2
HLA-C*03:02	45	54	10	FAFADLTVVY	netmhcpan	0.2	HLA-C*03:02	45	54	10	FAFADLTVVY	netmhcpan	0.2
HLA-C*03:02	45	55	11	FAFADLTVVYR	netmhcpan	0.2	HLA-C*03:02	45	55	11	FAFADLTVVYR	netmhcpan	0.2
HLA-C*03:02	47	60	14	FADLTVVYREGNPF	netmhcpan	0.2	HLA-C*03:02	47	60	14	FADLTVVYREGNPF	netmhcpan	0.2
HLA-C*03:04	45	52	8	FAFADLTV	netmhcpan	0.2	HLA-C*03:04	45	52	8	FAFADLTV	netmhcpan	0.2
HLA-C*03:04	45	53	9	FAFADLTVV	netmhcpan	0.2	HLA-C*03:04	45	53	9	FAFADLTVV	netmhcpan	0.2
HLA-C*03:04	47	60	14	FADLTVVYREGNPF	netmhcpan	0.2	HLA-C*03:04	47	60	14	FADLTVVYREGNPF	netmhcpan	0.2
HLA-C*03:04	81	88	8	YSVYGNTL	netmhcpan	0.2	HLA-C*03:04	81	88	8	YSVYGHTL	netmhcpan	0.2
HLA-C*08:01	45	52	8	FAFADLTV	netmhcpan	0.2	HLA-C*08:01	45	52	8	FAFADLTV	netmhcpan	0.2
HLA-C*08:01	45	53	9	FAFADLTVV	netmhcpan	0.2	HLA-C*08:01	45	53	9	FAFADLTVV	netmhcpan	0.2
HLA-C*08:01	47	60	14	FADLTVVYREGNPF	netmhcpan	0.2	HLA-C*08:01	47	60	14	FADLTVVYREGNPF	netmhcpan	0.2
HLA-A*11:01	51	64	14	TVVYREGNPFGICK	ann	0.3	HLA-A*11:01	51	64	14	TVVYREGNPFGICK	ann	0.3
HLA-A*11:01	52	64	13	VVYREGNPFGICK	ann	0.3	HLA-A*11:01	52	64	13	VVYREGNPFGICK	ann	0.3
HLA-A*11:01	81	93	13	YSVYGNTLEQTVK	ann	0.3	HLA-A*11:01	81	94	14	YSVYGHTLEQTVNK	ann	0.3
HLA-A*11:01	82	94	13	SVYGNTLEQTVKK	ann	0.3	HLA-A*11:01	82	94	13	SVYGHTLEQTVNK	ann	0.3
HLA-A*33:03	44	55	12	DFAFADLTVVYR	netmhcpan	0.3	HLA-A*33:03	44	55	12	DFAFADLTVVYR	netmhcpan	0.3
HLA-A*33:03	45	55	11	FAFADLTVVYR	netmhcpan	0.3	HLA-A*33:03	45	55	11	FAFADLTVVYR	netmhcpan	0.3
HLA-A*33:03	100	108	9	LIRCIICQR	netmhcpan	0.3	HLA-A*33:03	100	108	9	LIRCIICQR	netmhcpan	0.3
HLA-A*33:03	127	135	9	NISGRWAGR	netmhcpan	0.3	HLA-A*33:03	103	113	11	CIICQRPLCPR	netmhcpan	0.3
HLA-A*33:03	136	144	9	CAACWRSRR	netmhcpan	0.3	HLA-A*33:03	127	135	9	NISGRWAGR	netmhcpan	0.3
HLA-B*13:01	40	47	8	SEVYDFAF	netmhcpan	0.3	HLA-A*33:03	136	144	9	CAACWRSRR	netmhcpan	0.3
HLA-B*13:01	43	52	10	YDFAFADLTV	netmhcpan	0.3	HLA-B*13:01	40	47	8	SEVYDFAF	netmhcpan	0.3
HLA-B*13:01	43	53	11	YDFAFADLTVV	netmhcpan	0.3	HLA-B*13:01	43	52	10	YDFAFADLTV	netmhcpan	0.3
HLA-B*40:01	15	28	14	LCQALETTIHNIEL	ann	0.3	HLA-B*13:01	43	53	11	YDFAFADLTVV	netmhcpan	0.3
HLA-B*40:01	19	28	10	LETTIHNIEL	Consensus (ann/smm)	0.3	HLA-B*40:01	15	28	14	LCQALETTIHNIEL	ann	0.3
HLA-C*01:02	81	88	8	YSVYGNTL	netmhcpan	0.3	HLA-B*40:01	19	28	10	LETTIHNIEL	Consensus (ann/smm)	0.3
HLA-C*03:02	81	88	8	YSVYGNTL	netmhcpan	0.3	HLA-B*40:01	88	96	9	LEQTVNKPL	Consensus (ann/smm)	0.3
HLA-C*03:04	43	53	11	YDFAFADLTVV	netmhcpan	0.3	HLA-C*01:02	81	88	8	YSVYGHTL	netmhcpan	0.3
HLA-C*08:01	43	53	11	YDFAFADLTVV	netmhcpan	0.3	HLA-C*03:02	81	88	8	YSVYGHTL	netmhcpan	0.3
HLA-C*08:01	47	54	8	FADLTVVY	netmhcpan	0.3	HLA-C*03:04	43	53	11	YDFAFADLTVV	netmhcpan	0.3
HLA-A*11:01	61	72	12	GICKLCLRFLSK	ann	0.4	HLA-C*08:01	43	53	11	YDFAFADLTVV	netmhcpan	0.3
HLA-A*11:01	80	93	14	NYSVYGNTLEQTVK	ann	0.4	HLA-C*08:01	47	54	8	FADLTVVY	netmhcpan	0.3
HLA-A*11:01	81	94	14	YSVYGNTLEQTVKK	ann	0.4	HLA-C*08:01	81	88	8	YSVYGHTL	netmhcpan	0.3
HLA-A*33:03	66	77	12	CLRFLSKISEYR	netmhcpan	0.4	HLA-A*11:01	61	72	12	GICKLCLRFLSK	ann	0.4
HLA-A*33:03	69	77	9	FLSKISEYR	netmhcpan	0.4	HLA-A*11:01	83	94	12	VYGHTLEQTVNK	ann	0.4
HLA-A*33:03	136	143	8	CAACWRSR	netmhcpan	0.4	HLA-A*33:03	66	77	12	CLRFLSKITEYR	netmhcpan	0.4
HLA-B*40:01	17	28	12	QALETTIHNIEL	ann	0.4	HLA-A*33:03	69	77	9	FLSKITEYR	netmhcpan	0.4
HLA-B*40:01	40	50	11	SEVYDFAFADL	ann	0.4	HLA-A*33:03	136	143	8	CAACWRSR	netmhcpan	0.4
HLA-B*58:01	132	140	9	WAGRCAACW	Consensus (ann/comblib_sidney2008/smm)	0.4	HLA-B*40:01	17	28	12	QALETTIHNIEL	ann	0.4
HLA-B*58:01	133	140	8	AGRCAACW	ann	0.4	HLA-B*40:01	40	50	11	SEVYDFAFADL	ann	0.4
HLA-C*01:02	47	60	14	FADLTVVYREGNPF	netmhcpan	0.4	HLA-B*58:01	132	140	9	WAGRCAACW	Consensus (ann/comblib_sidney2008/smm)	0.4
HLA-C*03:02	43	53	11	YDFAFADLTVV	netmhcpan	0.4	HLA-B*58:01	133	140	8	AGRCAACW	ann	0.4
HLA-C*08:01	45	54	10	FAFADLTVVY	netmhcpan	0.4	HLA-C*01:02	47	60	14	FADLTVVYREGNPF	netmhcpan	0.4
HLA-C*08:01	81	88	8	YSVYGNTL	netmhcpan	0.4	HLA-C*03:02	43	53	11	YDFAFADLTVV	netmhcpan	0.4
HLA-A*11:01	64	72	9	KLCLRFLSK	Consensus (ann/smm)	0.45	HLA-C*08:01	45	54	10	FAFADLTVVY	netmhcpan	0.4
HLA-B*46:01	46	54	9	AFADLTVVY	Consensus (ann/smm)	0.45	HLA-A*11:01	64	72	9	KLCLRFLSK	Consensus (ann/smm)	0.45
HLA-A*02:01	97	110	14	NEILIRCIICQRPL	ann	0.5	HLA-B*46:01	46	54	9	AFADLTVVY	Consensus (ann/smm)	0.45
HLA-A*11:01	83	94	12	VYGNTLEQTVKK	ann	0.5	HLA-A*02:01	97	110	14	NEILIRCIICQRPL	ann	0.5
HLA-A*24:02	77	88	12	RHYNYSVYGNTL	ann	0.5	HLA-A*33:03	97	108	12	NEILIRCIICQR	netmhcpan	0.5
HLA-A*33:03	97	108	12	NEILIRCIICQR	netmhcpan	0.5	HLA-A*33:03	98	108	11	EILIRCIICQR	netmhcpan	0.5
HLA-A*33:03	98	108	11	EILIRCIICQR	netmhcpan	0.5	HLA-A*33:03	100	113	14	LIRCIICQRPLCPR	netmhcpan	0.5
HLA-A*33:03	125	135	11	FHNISGRWAGR	netmhcpan	0.5	HLA-A*33:03	125	135	11	FHNISGRWAGR	netmhcpan	0.5
HLA-B*13:01	40	52	13	SEVYDFAFADLTV	netmhcpan	0.5	HLA-B*13:01	40	52	13	SEVYDFAFADLTV	netmhcpan	0.5
HLA-B*15:02	53	60	8	VYREGNPF	ann	0.5	HLA-B*15:02	53	60	8	VYREGNPF	ann	0.5
HLA-B*15:02	69	76	8	FLSKISEY	ann	0.5	HLA-B*15:02	69	76	8	FLSKITEY	ann	0.5
HLA-B*40:01	55	65	11	REGNPFGICKL	ann	0.5	HLA-B*40:01	55	65	11	REGNPFGICKL	ann	0.5
HLA-B*40:01	88	100	13	LEQTVKKPLNEIL	ann	0.5	HLA-B*40:01	88	100	13	LEQTVNKPLNEIL	ann	0.5
HLA-B*46:01	40	53	14	SEVYDFAFADLTVV	ann	0.5	HLA-B*46:01	40	53	14	SEVYDFAFADLTVV	ann	0.5
HLA-B*46:01	42	53	12	VYDFAFADLTVV	ann	0.5	HLA-B*46:01	42	53	12	VYDFAFADLTVV	ann	0.5
HLA-B*46:01	47	60	14	FADLTVVYREGNPF	ann	0.5	HLA-B*46:01	47	60	14	FADLTVVYREGNPF	ann	0.5
HLA-C*03:02	45	56	12	FAFADLTVVYRE	netmhcpan	0.5	HLA-C*03:02	45	56	12	FAFADLTVVYRE	netmhcpan	0.5
HLA-C*03:02	69	76	8	FLSKISEY	netmhcpan	0.5	HLA-C*03:02	69	76	8	FLSKITEY	netmhcpan	0.5
HLA-C*03:04	45	54	10	FAFADLTVVY	netmhcpan	0.5	HLA-C*03:04	45	54	10	FAFADLTVVY	netmhcpan	0.5
HLA-A*24:02	131	140	10	RWAGRCAACW	Consensus (ann/smm)	0.55	HLA-A*11:01	86	94	9	HTLEQTVNK	Consensus (ann/smm)	0.55
HLA-B*58:01	130	140	11	GRWAGRCAACW	Consensus (ann/smm)	0.55	HLA-A*24:02	131	140	10	RWAGRCAACW	Consensus (ann/smm)	0.55
HLA-A*02:01	98	110	13	EILIRCIICQRPL	ann	0.6	HLA-B*40:01	113	121	9	REKKRHVDL	Consensus (ann/smm)	0.55
HLA-A*33:03	43	55	13	YDFAFADLTVVYR	netmhcpan	0.6	HLA-B*58:01	130	140	11	GRWAGRCAACW	Consensus (ann/smm)	0.55
HLA-A*33:03	101	108	8	IRCIICQR	netmhcpan	0.6	HLA-A*02:01	98	110	13	EILIRCIICQRPL	ann	0.6
HLA-A*33:03	124	135	12	RFHNISGRWAGR	netmhcpan	0.6	HLA-A*24:02	76	88	13	YRHYNYSVYGHTL	ann	0.6
HLA-B*15:02	35	47	13	KPLQRSEVYDFAF	ann	0.6	HLA-A*33:03	43	55	13	YDFAFADLTVVYR	netmhcpan	0.6
HLA-B*40:01	55	67	13	REGNPFGICKLCL	ann	0.6	HLA-A*33:03	101	108	8	IRCIICQR	netmhcpan	0.6
HLA-B*40:01	88	96	9	LEQTVKKPL	Consensus (ann/smm)	0.6	HLA-A*33:03	124	135	12	RFHNISGRWAGR	netmhcpan	0.6
HLA-B*46:01	52	60	9	VVYREGNPF	Consensus (ann/smm)	0.6	HLA-B*15:02	35	47	13	NPLQRSEVYDFAF	ann	0.6
HLA-B*58:01	128	140	13	ISGRWAGRCAACW	ann	0.6	HLA-B*40:01	25	37	13	NIELQCVECKNPL	ann	0.6
HLA-B*58:01	131	142	12	RWAGRCAACWRS	ann	0.6	HLA-B*40:01	26	37	12	IELQCVECKNPL	ann	0.6
HLA-C*03:02	45	57	13	FAFADLTVVYREG	netmhcpan	0.6	HLA-B*40:01	55	67	13	REGNPFGICKLCL	ann	0.6
HLA-A*24:02	76	88	13	YRHYNYSVYGNTL	ann	0.7	HLA-B*40:01	85	96	12	GHTLEQTVNKPL	ann	0.6
HLA-A*33:03	42	55	14	VYDFAFADLTVVYR	netmhcpan	0.7	HLA-B*46:01	52	60	9	VVYREGNPF	Consensus (ann/smm)	0.6
HLA-A*33:03	46	55	10	AFADLTVVYR	netmhcpan	0.7	HLA-B*58:01	128	140	13	ISGRWAGRCAACW	ann	0.6
HLA-A*33:03	136	145	10	CAACWRSRRR	netmhcpan	0.7	HLA-B*58:01	131	142	12	RWAGRCAACWRS	ann	0.6
HLA-B*13:01	16	23	8	CQALETTI	netmhcpan	0.7	HLA-C*03:02	45	57	13	FAFADLTVVYREG	netmhcpan	0.6
HLA-B*13:01	19	26	8	LETTIHNI	netmhcpan	0.7	HLA-A*33:03	42	55	14	VYDFAFADLTVVYR	netmhcpan	0.7
HLA-B*13:01	55	62	8	REGNPFGI	netmhcpan	0.7	HLA-A*33:03	46	55	10	AFADLTVVYR	netmhcpan	0.7
HLA-B*13:01	74	83	10	SEYRHYNYSV	netmhcpan	0.7	HLA-B*13:01	16	23	8	CQALETTI	netmhcpan	0.7
HLA-B*15:02	36	48	13	PLQRSEVYDFAFA	ann	0.7	HLA-B*13:01	19	26	8	LETTIHNI	netmhcpan	0.7
HLA-B*15:02	37	47	11	LQRSEVYDFAF	ann	0.7	HLA-B*13:01	55	62	8	REGNPFGI	netmhcpan	0.7
HLA-B*15:02	37	49	13	LQRSEVYDFAFAD	ann	0.7	HLA-B*15:02	36	48	13	PLQRSEVYDFAFA	ann	0.7
HLA-B*15:02	47	60	14	FADLTVVYREGNPF	ann	0.7	HLA-B*15:02	37	47	11	LQRSEVYDFAF	ann	0.7
HLA-B*15:02	48	60	13	ADLTVVYREGNPF	ann	0.7	HLA-B*15:02	37	49	13	LQRSEVYDFAFAD	ann	0.7
HLA-B*15:02	72	84	13	KISEYRHYNYSVY	ann	0.7	HLA-B*15:02	47	60	14	FADLTVVYREGNPF	ann	0.7
HLA-B*40:01	38	50	13	QRSEVYDFAFADL	ann	0.7	HLA-B*15:02	48	60	13	ADLTVVYREGNPF	ann	0.7
HLA-B*58:01	129	140	12	SGRWAGRCAACW	ann	0.7	HLA-B*15:02	72	84	13	KITEYRHYNYSVY	ann	0.7
HLA-A*24:02	53	62	10	VYREGNPFGI	Consensus (ann/smm)	0.8	HLA-B*40:01	38	50	13	QRSEVYDFAFADL	ann	0.7
HLA-A*33:03	99	108	10	ILIRCIICQR	netmhcpan	0.8	HLA-B*40:01	84	96	13	YGHTLEQTVNKPL	ann	0.7
HLA-B*13:01	40	53	14	SEVYDFAFADLTVV	netmhcpan	0.8	HLA-B*58:01	81	88	8	YSVYGHTL	ann	0.7
HLA-B*13:01	42	52	11	VYDFAFADLTV	netmhcpan	0.8	HLA-B*58:01	129	140	12	SGRWAGRCAACW	ann	0.7
HLA-B*15:02	36	47	12	PLQRSEVYDFAF	ann	0.8	HLA-C*01:02	77	88	12	RHYNYSVYGHTL	netmhcpan	0.7
HLA-B*15:02	37	48	12	LQRSEVYDFAFA	ann	0.8	HLA-A*24:02	53	62	10	VYREGNPFGI	Consensus (ann/smm)	0.8
HLA-B*15:02	49	61	13	DLTVVYREGNPFG	ann	0.8	HLA-A*33:03	70	77	8	LSKITEYR	netmhcpan	0.8
HLA-B*15:02	50	60	11	LTVVYREGNPF	ann	0.8	HLA-A*33:03	99	108	10	ILIRCIICQR	netmhcpan	0.8
HLA-B*15:02	51	60	10	TVVYREGNPF	ann	0.8	HLA-A*33:03	102	113	12	RCIICQRPLCPR	netmhcpan	0.8
HLA-B*15:02	73	84	12	ISEYRHYNYSVY	ann	0.8	HLA-B*13:01	40	53	14	SEVYDFAFADLTVV	netmhcpan	0.8
HLA-B*15:02	73	85	13	ISEYRHYNYSVYG	ann	0.8	HLA-B*13:01	42	52	11	VYDFAFADLTV	netmhcpan	0.8
HLA-B*15:02	74	84	11	SEYRHYNYSVY	ann	0.8	HLA-B*15:02	36	47	12	PLQRSEVYDFAF	ann	0.8
HLA-B*15:02	74	86	13	SEYRHYNYSVYGN	ann	0.8	HLA-B*15:02	37	48	12	LQRSEVYDFAFA	ann	0.8
HLA-B*15:02	75	84	10	EYRHYNYSVY	ann	0.8	HLA-B*15:02	49	61	13	DLTVVYREGNPFG	ann	0.8
HLA-B*15:02	75	85	11	EYRHYNYSVYG	ann	0.8	HLA-B*15:02	50	60	11	LTVVYREGNPF	ann	0.8
HLA-B*15:02	75	87	13	EYRHYNYSVYGNT	ann	0.8	HLA-B*15:02	51	60	10	TVVYREGNPF	ann	0.8
HLA-B*15:02	76	85	10	YRHYNYSVYG	ann	0.8	HLA-B*15:02	73	84	12	ITEYRHYNYSVY	ann	0.8
HLA-B*15:02	76	86	11	YRHYNYSVYGN	ann	0.8	HLA-B*15:02	73	85	13	ITEYRHYNYSVYG	ann	0.8
HLA-B*15:02	76	88	13	YRHYNYSVYGNTL	ann	0.8	HLA-B*15:02	74	84	11	TEYRHYNYSVY	ann	0.8
HLA-B*40:01	26	37	12	IELQCVECKKPL	ann	0.8	HLA-B*15:02	74	86	13	TEYRHYNYSVYGH	ann	0.8
HLA-B*40:01	39	50	12	RSEVYDFAFADL	ann	0.8	HLA-B*15:02	75	84	10	EYRHYNYSVY	ann	0.8
HLA-B*40:01	53	65	13	VYREGNPFGICKL	ann	0.8	HLA-B*15:02	75	85	11	EYRHYNYSVYG	ann	0.8
HLA-B*40:01	54	65	12	YREGNPFGICKL	ann	0.8	HLA-B*15:02	75	87	13	EYRHYNYSVYGHT	ann	0.8
HLA-B*46:01	41	53	13	EVYDFAFADLTVV	ann	0.8	HLA-B*15:02	76	85	10	YRHYNYSVYG	ann	0.8
HLA-B*58:01	128	141	14	ISGRWAGRCAACWR	ann	0.8	HLA-B*15:02	76	86	11	YRHYNYSVYGH	ann	0.8
HLA-B*58:01	130	141	12	GRWAGRCAACWR	ann	0.8	HLA-B*15:02	76	88	13	YRHYNYSVYGHTL	ann	0.8
HLA-B*58:01	131	143	13	RWAGRCAACWRSR	ann	0.8	HLA-B*40:01	39	50	12	RSEVYDFAFADL	ann	0.8
HLA-C*03:02	45	58	14	FAFADLTVVYREGN	netmhcpan	0.8	HLA-B*40:01	53	65	13	VYREGNPFGICKL	ann	0.8
HLA-C*03:04	44	53	10	DFAFADLTVV	netmhcpan	0.8	HLA-B*40:01	54	65	12	YREGNPFGICKL	ann	0.8
HLA-C*08:01	44	53	10	DFAFADLTVV	netmhcpan	0.8	HLA-B*46:01	41	53	13	EVYDFAFADLTVV	ann	0.8
HLA-A*24:02	59	69	11	PFGICKLCLRF	Consensus (ann/smm)	0.85	HLA-B*58:01	128	141	14	ISGRWAGRCAACWR	ann	0.8
HLA-B*40:01	97	105	9	NEILIRCII	Consensus (ann/smm)	0.85	HLA-B*58:01	130	141	12	GRWAGRCAACWR	ann	0.8
HLA-A*02:01	99	110	12	ILIRCIICQRPL	ann	0.9	HLA-B*58:01	131	143	13	RWAGRCAACWRSR	ann	0.8
HLA-A*24:02	42	50	9	VYDFAFADL	Consensus (ann/smm)	0.9	HLA-C*03:02	45	58	14	FAFADLTVVYREGN	netmhcpan	0.8
HLA-A*33:03	68	77	10	RFLSKISEYR	netmhcpan	0.9	HLA-C*03:04	44	53	10	DFAFADLTVV	netmhcpan	0.8
HLA-A*33:03	70	77	8	LSKISEYR	netmhcpan	0.9	HLA-C*08:01	44	53	10	DFAFADLTVV	netmhcpan	0.8
HLA-A*33:03	96	108	13	LNEILIRCIICQR	netmhcpan	0.9	HLA-A*24:02	59	69	11	PFGICKLCLRF	Consensus (ann/smm)	0.85
HLA-B*13:01	45	52	8	FAFADLTV	netmhcpan	0.9	HLA-B*40:01	97	105	9	NEILIRCII	Consensus (ann/smm)	0.85
HLA-B*15:02	49	60	12	DLTVVYREGNPF	ann	0.9	HLA-A*02:01	99	110	12	ILIRCIICQRPL	ann	0.9
HLA-B*15:02	52	61	10	VVYREGNPFG	ann	0.9	HLA-A*24:02	42	50	9	VYDFAFADL	Consensus (ann/smm)	0.9
HLA-B*15:02	74	85	12	SEYRHYNYSVYG	ann	0.9	HLA-A*24:02	80	88	9	NYSVYGHTL	Consensus (ann/smm)	0.9
HLA-B*15:02	75	86	12	EYRHYNYSVYGN	ann	0.9	HLA-A*33:03	68	77	10	RFLSKITEYR	netmhcpan	0.9
HLA-B*15:02	76	87	12	YRHYNYSVYGNT	ann	0.9	HLA-A*33:03	96	108	13	LNEILIRCIICQR	netmhcpan	0.9
HLA-B*40:01	19	29	11	LETTIHNIELQ	ann	0.9	HLA-A*33:03	104	113	10	IICQRPLCPR	netmhcpan	0.9
HLA-B*40:01	25	37	13	NIELQCVECKKPL	ann	0.9	HLA-B*13:01	45	52	8	FAFADLTV	netmhcpan	0.9
HLA-B*40:01	55	63	9	REGNPFGIC	Consensus (ann/smm)	0.9	HLA-B*15:02	49	60	12	DLTVVYREGNPF	ann	0.9
HLA-B*46:01	46	53	8	AFADLTVV	ann	0.9	HLA-B*15:02	52	61	10	VVYREGNPFG	ann	0.9
HLA-A*24:02	41	52	12	EVYDFAFADLTV	ann	1	HLA-B*15:02	74	85	12	TEYRHYNYSVYG	ann	0.9
HLA-A*24:02	51	62	12	TVVYREGNPFGI	ann	1	HLA-B*15:02	75	86	12	EYRHYNYSVYGH	ann	0.9
HLA-A*24:02	78	89	12	HYNYSVYGNTLE	ann	1	HLA-B*15:02	76	87	12	YRHYNYSVYGHT	ann	0.9
HLA-A*24:02	79	90	12	YNYSVYGNTLEQ	ann	1	HLA-B*40:01	19	29	11	LETTIHNIELQ	ann	0.9
HLA-A*24:02	129	140	12	SGRWAGRCAACW	ann	1	HLA-B*40:01	24	37	14	HNIELQCVECKNPL	ann	0.9
HLA-A*24:02	130	141	12	GRWAGRCAACWR	ann	1	HLA-B*40:01	55	63	9	REGNPFGIC	Consensus (ann/smm)	0.9
HLA-A*24:02	131	142	12	RWAGRCAACWRS	ann	1	HLA-B*40:01	86	96	11	HTLEQTVNKPL	ann	0.9
HLA-A*33:03	60	68	9	FGICKLCLR	netmhcpan	1	HLA-B*40:01	87	100	14	TLEQTVNKPLNEIL	ann	0.9
HLA-B*15:02	34	47	14	KKPLQRSEVYDFAF	ann	1	HLA-B*46:01	46	53	8	AFADLTVV	ann	0.9
HLA-B*15:02	40	47	8	SEVYDFAF	ann	1	HLA-A*24:02	41	52	12	EVYDFAFADLTV	ann	1
HLA-B*40:01	18	29	12	ALETTIHNIELQ	ann	1	HLA-A*24:02	51	62	12	TVVYREGNPFGI	ann	1
HLA-B*40:01	87	100	14	TLEQTVKKPLNEIL	ann	1	HLA-A*24:02	75	88	14	EYRHYNYSVYGHTL	ann	1
HLA-B*58:01	129	141	13	SGRWAGRCAACWR	ann	1	HLA-A*24:02	77	89	13	RHYNYSVYGHTLE	ann	1
HLA-B*58:01	130	142	13	GRWAGRCAACWRS	ann	1	HLA-A*24:02	78	89	12	HYNYSVYGHTLE	ann	1
HLA-B*58:01	131	144	14	RWAGRCAACWRSRR	ann	1	HLA-A*24:02	79	90	12	YNYSVYGHTLEQ	ann	1
HLA-C*01:02	45	52	8	FAFADLTV	netmhcpan	1	HLA-A*24:02	129	140	12	SGRWAGRCAACW	ann	1
HLA-C*01:02	77	88	12	RHYNYSVYGNTL	netmhcpan	1	HLA-A*24:02	130	141	12	GRWAGRCAACWR	ann	1
							HLA-A*24:02	131	142	12	RWAGRCAACWRS	ann	1
							HLA-A*33:03	60	68	9	FGICKLCLR	netmhcpan	1
							HLA-A*33:03	65	77	13	LCLRFLSKITEYR	netmhcpan	1
							HLA-B*15:02	34	47	14	KNPLQRSEVYDFAF	ann	1
							HLA-B*15:02	40	47	8	SEVYDFAF	ann	1
							HLA-B*40:01	18	29	12	ALETTIHNIELQ	ann	1
							HLA-B*58:01	129	141	13	SGRWAGRCAACWR	ann	1
							HLA-B*58:01	130	142	13	GRWAGRCAACWRS	ann	1
							HLA-B*58:01	131	144	14	RWAGRCAACWRSRR	ann	1
							HLA-C*01:02	45	52	8	FAFADLTV	netmhcpan	1
							HLA-C*01:02	79	88	10	YNYSVYGHTL	netmhcpan	1

## Sheet: Table S6
Table S6. The diversity of predicted binders of HPV-33 E7 for HLA-I alleles between reference and variant sequences
HPV-33-E7 reference sequence epitopes for HLA-Ⅰ							HPV-33-E7 variant-1 sequences epitopes for HLA-Ⅰ							HPV-33-E7 variant-2 sequences epitopes for HLA-Ⅰ
Allele	Start	End	Length	Peptide	Method used	Percentile rank	Allele	Start	End	Length	Peptide	Method used	Percentile rank	Allele	Start	End	Length	Peptide	Method used	Percentile rank
HLA-B*58:01	77	84	8	RTIQQLLM	ann	0.1	HLA-B*58:01	77	84	8	RTIQQLLM	ann	0.1	HLA-B*58:01	77	84	8	RTIQQLLM	ann	0.1
HLA-A*02:01	82	90	9	LLMGTVNIV	Consensus (ann/comblib_sidney2008/smm)	0.4	HLA-A*02:01	82	90	9	LLMGTVNIV	Consensus (ann/comblib_sidney2008/smm)	0.4	HLA-A*02:01	82	90	9	LLMGTVNIV	Consensus (ann/comblib_sidney2008/smm)	0.4
HLA-A*02:01	77	90	14	RTIQQLLMGTVNIV	ann	0.5	HLA-A*02:01	77	90	14	RTIQQLLMGTVNIV	ann	0.5	HLA-A*02:01	77	90	14	RTIQQLLMGTVNIV	ann	0.5
HLA-A*02:01	81	90	10	QLLMGTVNIV	Consensus (ann/smm)	0.55	HLA-A*02:01	81	90	10	QLLMGTVNIV	Consensus (ann/smm)	0.55	HLA-A*02:01	81	90	10	QLLMGTVNIV	Consensus (ann/smm)	0.55
HLA-A*24:02	52	61	10	YYIVTCCHTC	Consensus (ann/smm)	0.6	HLA-A*24:02	52	61	10	YYIVTCCHTC	Consensus (ann/smm)	0.6	HLA-A*24:02	52	61	10	YYIVTCCHTC	Consensus (ann/smm)	0.6
HLA-A*33:03	59	66	8	HTCNTTVR	netmhcpan	0.6	HLA-A*33:03	59	66	8	HTCNTTVR	netmhcpan	0.6	HLA-A*33:03	59	66	8	HTCNTTVR	netmhcpan	0.6
HLA-A*02:01	78	90	13	TIQQLLMGTVNIV	ann	0.7	HLA-A*02:01	78	90	13	TIQQLLMGTVNIV	ann	0.7	HLA-A*02:01	78	90	13	TIQQLLMGTVNIV	ann	0.7
HLA-A*02:01	53	65	13	YIVTCCHTCNTTV	ann	0.8	HLA-A*02:01	53	65	13	YIVTCCHTCNTTV	ann	0.8	HLA-A*02:01	53	65	13	YIVTCCHTCNTTV	ann	0.8
HLA-B*15:02	43	52	10	GQAQPATADY	ann	0.8	HLA-B*15:02	43	52	10	GQVQPATADY	ann	0.9	HLA-A*02:01	81	93	13	QLLMGTVNIVCPT	ann	1
HLA-A*02:01	81	93	13	QLLMGTVNIVCPT	ann	1	HLA-A*02:01	81	93	13	QLLMGTVNIVCPT	ann	1	HLA-A*24:02	15	24	10	LYPEPTDLYC	Consensus (ann/smm)	1
HLA-A*24:02	15	24	10	LYPEPTDLYC	Consensus (ann/smm)	1	HLA-A*24:02	15	24	10	LYPEPTDLYC	Consensus (ann/smm)	1	HLA-A*24:02	15	28	14	LYPEPTDLYCYEQL	ann	1
HLA-A*24:02	15	28	14	LYPEPTDLYCYEQL	ann	1	HLA-A*24:02	15	28	14	LYPEPTDLYCYEQL	ann	1	HLA-B*13:01	80	89	10	QQLLMGTVNI	netmhcpan	1
HLA-B*13:01	80	89	10	QQLLMGTVNI	netmhcpan	1	HLA-B*13:01	80	89	10	QQLLMGTVNI	netmhcpan	1	HLA-B*58:01	72	83	12	TASDLRTIQQLL	ann	1
HLA-B*15:02	42	52	11	DGQAQPATADY	ann	1	HLA-B*58:01	72	83	12	TASDLRTIQQLL	ann	1	HLA-B*58:01	72	84	13	TASDLRTIQQLLM	ann	1
HLA-B*58:01	72	83	12	TASDLRTIQQLL	ann	1	HLA-B*58:01	72	84	13	TASDLRTIQQLLM	ann	1	HLA-C*03:02	11	23	13	YVLDLYPEPTDLY	netmhcpan	1
HLA-B*58:01	72	84	13	TASDLRTIQQLLM	ann	1	HLA-C*03:02	11	23	13	YVLDLYPEPTDLY	netmhcpan	1
HLA-C*03:02	11	23	13	YVLDLYPEPTDLY	netmhcpan	1

## Sheet: Table S7
Table S7. Predicted epitopes binders for HLA-II alleles of HPV-33 E6
HPV-33-E6 reference sequence epitopes for HLA-II								HPV-33-E6 variant sequences epitopes for HLA-II
Allele	Start	End	Length	Peptide	Binding core	Method used	Percentile rank	Allele	Start	End	Length	Peptide	Binding core	Method used	Percentile rank
HLA-DRB1*15:02	70	84	15	LSKISEYRHYNYSVY	YRHYNYSVY	sturniolo	0.4	HLA-DRB1*15:02	70	84	15	LSKITEYRHYNYSVY	YRHYNYSVY	sturniolo	0.4
HLA-DRB1*15:02	71	85	15	SKISEYRHYNYSVYG	YRHYNYSVY	sturniolo	0.4	HLA-DRB1*15:02	71	85	15	SKITEYRHYNYSVYG	YRHYNYSVY	sturniolo	0.4
HLA-DRB1*15:02	72	86	15	KISEYRHYNYSVYGN	YRHYNYSVY	sturniolo	0.4	HLA-DRB1*15:02	72	86	15	KITEYRHYNYSVYGH	YRHYNYSVY	sturniolo	0.4
HLA-DRB1*15:02	73	87	15	ISEYRHYNYSVYGNT	YRHYNYSVY	sturniolo	0.4	HLA-DRB1*15:02	73	87	15	ITEYRHYNYSVYGHT	YRHYNYSVY	sturniolo	0.4
HLA-DRB1*15:02	74	88	15	SEYRHYNYSVYGNTL	YRHYNYSVY	sturniolo	0.4	HLA-DRB1*15:02	74	88	15	TEYRHYNYSVYGHTL	YRHYNYSVY	sturniolo	0.4
HLA-DRB1*15:02	75	89	15	EYRHYNYSVYGNTLE	YRHYNYSVY	sturniolo	0.4	HLA-DRB1*15:02	75	89	15	EYRHYNYSVYGHTLE	YRHYNYSVY	sturniolo	0.4
HLA-DRB1*15:02	76	90	15	YRHYNYSVYGNTLEQ	YRHYNYSVY	sturniolo	0.4	HLA-DRB1*15:02	76	90	15	YRHYNYSVYGHTLEQ	YRHYNYSVY	sturniolo	0.4
HLA-DQA1*01:01/DQB1*02:01	40	54	15	SEVYDFAFADLTVVY	YDFAFADLT	NetMHCIIpan	0.94	HLA-DQA1*01:01/DQB1*02:01	40	54	15	SEVYDFAFADLTVVY	DFAFADLTV	NetMHCIIpan	0.94
HLA-DQA1*01:01/DQB1*02:01	41	55	15	EVYDFAFADLTVVYR	DFAFADLTV	NetMHCIIpan	1.06	HLA-DQA1*01:01/DQB1*02:01	41	55	15	EVYDFAFADLTVVYR	DFAFADLTV	NetMHCIIpan	1.06
HLA-DRB1*12:02	62	76	15	ICKLCLRFLSKISEY	LRFLSKISE	NetMHCIIpan	1.13	HLA-DQA1*01:01/DQB1*02:01	39	53	15	RSEVYDFAFADLTVV	DFAFADLTV	NetMHCIIpan	1.22
HLA-DRB1*12:02	63	77	15	CKLCLRFLSKISEYR	LRFLSKISE	NetMHCIIpan	1.17	HLA-DRB1*12:02	62	76	15	ICKLCLRFLSKITEY	LRFLSKITE	NetMHCIIpan	1.31
HLA-DQA1*01:01/DQB1*02:01	39	53	15	RSEVYDFAFADLTVV	YDFAFADLT	NetMHCIIpan	1.22	HLA-DRB1*12:02	63	77	15	CKLCLRFLSKITEYR	LRFLSKITE	NetMHCIIpan	1.31
HLA-DRB1*12:02	64	78	15	KLCLRFLSKISEYRH	LRFLSKISE	NetMHCIIpan	1.38	HLA-DQA1*01:01/DQB1*02:01	42	56	15	VYDFAFADLTVVYRE	DFAFADLTV	NetMHCIIpan	1.47
HLA-DRB1*12:02	61	75	15	GICKLCLRFLSKISE	CKLCLRFLS	NetMHCIIpan	1.4	HLA-DRB1*12:02	64	78	15	KLCLRFLSKITEYRH	LRFLSKITE	NetMHCIIpan	1.48
HLA-DQA1*01:01/DQB1*02:01	42	56	15	VYDFAFADLTVVYRE	DFAFADLTV	NetMHCIIpan	1.47	HLA-DRB1*12:02	61	75	15	GICKLCLRFLSKITE	CKLCLRFLS	NetMHCIIpan	1.51
HLA-DRB1*12:02	60	74	15	FGICKLCLRFLSKIS	CKLCLRFLS	NetMHCIIpan	1.59	HLA-DRB1*12:02	60	74	15	FGICKLCLRFLSKIT	CKLCLRFLS	NetMHCIIpan	1.65
HLA-DRB1*12:02	65	79	15	LCLRFLSKISEYRHY	LRFLSKISE	NetMHCIIpan	1.72	HLA-DQA1*01:01/DQB1*05:01	40	54	15	SEVYDFAFADLTVVY	YDFAFADLT	Consensus (comb.lib./smm/nn)	1.8
HLA-DQA1*01:01/DQB1*05:01	40	54	15	SEVYDFAFADLTVVY	YDFAFADLT	Consensus (comb.lib./smm/nn)	1.8	HLA-DQA1*01:01/DQB1*05:01	39	53	15	RSEVYDFAFADLTVV	YDFAFADLT	Consensus (comb.lib./smm/nn)	1.85
HLA-DQA1*01:01/DQB1*05:01	39	53	15	RSEVYDFAFADLTVV	FAFADLTVV	Consensus (comb.lib./smm/nn)	1.85	HLA-DRB1*12:02	65	79	15	LCLRFLSKITEYRHY	LRFLSKITE	NetMHCIIpan	2.05
HLA-DQA1*01:01/DQB1*02:01	38	52	15	QRSEVYDFAFADLTV	DFAFADLTV	NetMHCIIpan	2.07	HLA-DQA1*01:01/DQB1*02:01	38	52	15	QRSEVYDFAFADLTV	DFAFADLTV	NetMHCIIpan	2.07
HLA-DQA1*01:01/DQB1*05:01	41	55	15	EVYDFAFADLTVVYR	YDFAFADLT	Consensus (comb.lib./smm/nn)	2.24	HLA-DQA1*01:01/DQB1*05:01	41	55	15	EVYDFAFADLTVVYR	YDFAFADLT	Consensus (comb.lib./smm/nn)	2.24
HLA-DRB1*12:02	59	73	15	PFGICKLCLRFLSKI	CKLCLRFLS	NetMHCIIpan	2.37	HLA-DRB1*12:02	59	73	15	PFGICKLCLRFLSKI	CKLCLRFLS	NetMHCIIpan	2.37
HLA-DRB1*14:01	65	79	15	LCLRFLSKISEYRHY	FLSKISEYR	NetMHCIIpan	2.47	HLA-DRB1*15:02	48	62	15	ADLTVVYREGNPFGI	YREGNPFGI	sturniolo	2.48
HLA-DRB1*15:02	48	62	15	ADLTVVYREGNPFGI	YREGNPFGI	sturniolo	2.48	HLA-DRB1*15:02	49	63	15	DLTVVYREGNPFGIC	YREGNPFGI	sturniolo	2.48
HLA-DRB1*15:02	49	63	15	DLTVVYREGNPFGIC	YREGNPFGI	sturniolo	2.48	HLA-DRB1*15:02	50	64	15	LTVVYREGNPFGICK	YREGNPFGI	sturniolo	2.48
HLA-DRB1*15:02	50	64	15	LTVVYREGNPFGICK	YREGNPFGI	sturniolo	2.48	HLA-DRB1*15:02	51	65	15	TVVYREGNPFGICKL	YREGNPFGI	sturniolo	2.48
HLA-DRB1*15:02	51	65	15	TVVYREGNPFGICKL	YREGNPFGI	sturniolo	2.48	HLA-DRB1*15:02	52	66	15	VVYREGNPFGICKLC	YREGNPFGI	sturniolo	2.48
HLA-DRB1*15:02	52	66	15	VVYREGNPFGICKLC	YREGNPFGI	sturniolo	2.48	HLA-DRB1*15:02	53	67	15	VYREGNPFGICKLCL	YREGNPFGI	sturniolo	2.48
HLA-DRB1*15:02	53	67	15	VYREGNPFGICKLCL	YREGNPFGI	sturniolo	2.48	HLA-DRB1*15:02	54	68	15	YREGNPFGICKLCLR	YREGNPFGI	sturniolo	2.48
HLA-DRB1*15:02	54	68	15	YREGNPFGICKLCLR	YREGNPFGI	sturniolo	2.48	HLA-DQA1*01:01/DQB1*05:01	38	52	15	QRSEVYDFAFADLTV	YDFAFADLT	Consensus (comb.lib./smm/nn)	2.57
HLA-DRB1*15:02	134	148	15	GRCAACWRSRRRETA	WRSRRRETA	sturniolo	2.48	HLA-DRB1*14:01	65	79	15	LCLRFLSKITEYRHY	FLSKITEYR	NetMHCIIpan	2.57
HLA-DRB1*15:02	135	149	15	RCAACWRSRRRETAL	WRSRRRETA	sturniolo	2.48	HLA-DRB1*15:02	46	60	15	AFADLTVVYREGNPF	VVYREGNPF	sturniolo	2.7
HLA-DRB1*14:01	64	78	15	KLCLRFLSKISEYRH	FLSKISEYR	NetMHCIIpan	2.53	HLA-DRB1*15:02	47	61	15	FADLTVVYREGNPFG	VVYREGNPF	sturniolo	2.7
HLA-DQA1*01:01/DQB1*05:01	38	52	15	QRSEVYDFAFADLTV	YDFAFADLT	Consensus (comb.lib./smm/nn)	2.57	HLA-DRB1*14:01	64	78	15	KLCLRFLSKITEYRH	FLSKITEYR	NetMHCIIpan	2.7
HLA-DRB1*15:02	46	60	15	AFADLTVVYREGNPF	VVYREGNPF	sturniolo	2.7	HLA-DRB1*12:02	58	72	15	NPFGICKLCLRFLSK	CKLCLRFLS	NetMHCIIpan	3.13
HLA-DRB1*15:02	47	61	15	FADLTVVYREGNPFG	VVYREGNPF	sturniolo	2.7	HLA-DRB1*12:02	66	80	15	CLRFLSKITEYRHYN	LRFLSKITE	NetMHCIIpan	3.17
HLA-DRB1*12:02	66	80	15	CLRFLSKISEYRHYN	LRFLSKISE	NetMHCIIpan	2.97	HLA-DQA1*01:01/DQB1*02:01	43	57	15	YDFAFADLTVVYREG	DFAFADLTV	NetMHCIIpan	3.37
HLA-DRB1*12:02	58	72	15	NPFGICKLCLRFLSK	CKLCLRFLS	NetMHCIIpan	3.13	HLA-DRB1*14:01	63	77	15	CKLCLRFLSKITEYR	LRFLSKITE	NetMHCIIpan	3.4
HLA-DQA1*01:01/DQB1*02:01	43	57	15	YDFAFADLTVVYREG	DFAFADLTV	NetMHCIIpan	3.37	HLA-DQA1*01:01/DQB1*05:01	42	56	15	VYDFAFADLTVVYRE	YDFAFADLT	Consensus (comb.lib./smm/nn)	3.46
HLA-DRB1*14:01	63	77	15	CKLCLRFLSKISEYR	LRFLSKISE	NetMHCIIpan	3.37	HLA-DRB1*14:01	66	80	15	CLRFLSKITEYRHYN	FLSKITEYR	NetMHCIIpan	3.63
HLA-DRB1*14:01	66	80	15	CLRFLSKISEYRHYN	FLSKISEYR	NetMHCIIpan	3.4	HLA-DPA1*01:03/DPB1*04:01	40	54	15	SEVYDFAFADLTVVY	FAFADLTVV	NetMHCIIpan	4.48
HLA-DQA1*01:01/DQB1*05:01	42	56	15	VYDFAFADLTVVYRE	YDFAFADLT	Consensus (comb.lib./smm/nn)	3.46	HLA-DPA1*01:03/DPB1*04:01	41	55	15	EVYDFAFADLTVVYR	FAFADLTVV	NetMHCIIpan	4.57
HLA-DPA1*01:03/DPB1*04:01	40	54	15	SEVYDFAFADLTVVY	FAFADLTVV	NetMHCIIpan	4.48	HLA-DRB1*14:01	67	81	15	LRFLSKITEYRHYNY	FLSKITEYR	NetMHCIIpan	4.57
HLA-DPA1*01:03/DPB1*04:01	41	55	15	EVYDFAFADLTVVYR	FAFADLTVV	NetMHCIIpan	4.57	HLA-DPA1*01:03/DPB1*04:01	39	53	15	RSEVYDFAFADLTVV	FAFADLTVV	NetMHCIIpan	4.66
HLA-DPA1*01:03/DPB1*04:01	39	53	15	RSEVYDFAFADLTVV	DFAFADLTV	NetMHCIIpan	4.66
HLA-DRB1*14:01	67	81	15	LRFLSKISEYRHYNY	FLSKISEYR	NetMHCIIpan	4.93

## Sheet: Table S8
Table S8. Predicted epitopes binders for HLA-II alleles of HPV-33 E7
HPV-33-E7 reference sequence epitopes for HLA-II								HPV-33-E7 variant-1 sequences epitopes for HLA-II								HPV-33-E7 variant-2 sequences epitopes for HLA-II
Allele	Start	End	Length	Peptide	Binding core	Method used	Percentile rank	Allele	Start	End	Length	Peptide	Binding core	Method used	Percentile rank	Allele	Start	End	Length	Peptide	Binding core	Method used	Percentile rank
HLA-DQA1*01:01/DQB1*05:01	7	21	15	TLKEYVLDLYPEPTD	LKEYVLDLY	Consensus (comb.lib./smm/nn)	1.59	HLA-DQA1*01:01/DQB1*05:01	7	21	15	TLKEYVLDLYPEPTD	LKEYVLDLY	Consensus (comb.lib./smm/nn)	1.59	HLA-DQA1*01:01/DQB1*05:01	7	21	15	TLKEYVLDLYPEPTD	LKEYVLDLY	Consensus (comb.lib./smm/nn)	1.59
HLA-DQA1*01:01/DQB1*05:01	8	22	15	LKEYVLDLYPEPTDL	LKEYVLDLY	Consensus (comb.lib./smm/nn)	1.86	HLA-DQA1*01:01/DQB1*05:01	8	22	15	LKEYVLDLYPEPTDL	LKEYVLDLY	Consensus (comb.lib./smm/nn)	1.86	HLA-DQA1*01:01/DQB1*05:01	8	22	15	LKEYVLDLYPEPTDL	LKEYVLDLY	Consensus (comb.lib./smm/nn)	1.86
HLA-DQA1*01:01/DQB1*02:01	6	20	15	PTLKEYVLDLYPEPT	YVLDLYPEP	NetMHCIIpan	1.99	HLA-DQA1*01:01/DQB1*02:01	6	20	15	PTLKEYVLDLYPEPT	YVLDLYPEP	NetMHCIIpan	1.99	HLA-DQA1*01:01/DQB1*02:01	6	20	15	PTLKEYVLDLYPEPT	YVLDLYPEP	NetMHCIIpan	1.99
HLA-DRB1*15:02	59	73	15	HTCNTTVRLCVNSTA	VRLCVNSTA	sturniolo	2.03	HLA-DRB1*15:02	59	73	15	HTCNTTVRLCVNSTA	VRLCVNSTA	sturniolo	2.03	HLA-DRB1*15:02	59	73	15	HTCNTTVRLCVNSTA	VRLCVNSTA	sturniolo	2.03
HLA-DRB1*15:02	60	74	15	TCNTTVRLCVNSTAS	VRLCVNSTA	sturniolo	2.03	HLA-DRB1*15:02	60	74	15	TCNTTVRLCVNSTAS	VRLCVNSTA	sturniolo	2.03	HLA-DRB1*15:02	60	74	15	TCNTTVRLCVNSTAS	VRLCVNSTA	sturniolo	2.03
HLA-DRB1*15:02	61	75	15	CNTTVRLCVNSTASD	VRLCVNSTA	sturniolo	2.03	HLA-DRB1*15:02	61	75	15	CNTTVRLCVNSTASD	VRLCVNSTA	sturniolo	2.03	HLA-DRB1*15:02	61	75	15	CNTTVRLCVNSTASD	VRLCVNSTA	sturniolo	2.03
HLA-DRB1*15:02	62	76	15	NTTVRLCVNSTASDL	VRLCVNSTA	sturniolo	2.03	HLA-DRB1*15:02	62	76	15	NTTVRLCVNSTASDL	VRLCVNSTA	sturniolo	2.03	HLA-DRB1*15:02	62	76	15	NTTVRLCVNSTASDL	VRLCVNSTA	sturniolo	2.03
HLA-DRB1*15:02	63	77	15	TTVRLCVNSTASDLR	VRLCVNSTA	sturniolo	2.03	HLA-DRB1*15:02	63	77	15	TTVRLCVNSTASDLR	VRLCVNSTA	sturniolo	2.03	HLA-DRB1*15:02	63	77	15	TTVRLCVNSTASDLR	VRLCVNSTA	sturniolo	2.03
HLA-DRB1*15:02	64	78	15	TVRLCVNSTASDLRT	VRLCVNSTA	sturniolo	2.03	HLA-DRB1*15:02	64	78	15	TVRLCVNSTASDLRT	VRLCVNSTA	sturniolo	2.03	HLA-DRB1*15:02	64	78	15	TVRLCVNSTASDLRT	VRLCVNSTA	sturniolo	2.03
HLA-DRB1*15:02	65	79	15	VRLCVNSTASDLRTI	VRLCVNSTA	sturniolo	2.03	HLA-DRB1*15:02	65	79	15	VRLCVNSTASDLRTI	VRLCVNSTA	sturniolo	2.03	HLA-DRB1*15:02	65	79	15	VRLCVNSTASDLRTI	VRLCVNSTA	sturniolo	2.03
HLA-DQA1*01:01/DQB1*05:01	5	19	15	KPTLKEYVLDLYPEP	YVLDLYPEP	Consensus (comb.lib./smm/nn)	2.13	HLA-DQA1*01:01/DQB1*05:01	5	19	15	KPTLKEYVLDLYPEP	YVLDLYPEP	Consensus (comb.lib./smm/nn)	2.13	HLA-DQA1*01:01/DQB1*05:01	5	19	15	KPTLKEYVLDLYPEP	YVLDLYPEP	Consensus (comb.lib./smm/nn)	2.13
HLA-DQA1*01:01/DQB1*05:01	6	20	15	PTLKEYVLDLYPEPT	YVLDLYPEP	Consensus (comb.lib./smm/nn)	2.13	HLA-DQA1*01:01/DQB1*05:01	6	20	15	PTLKEYVLDLYPEPT	YVLDLYPEP	Consensus (comb.lib./smm/nn)	2.13	HLA-DQA1*01:01/DQB1*05:01	6	20	15	PTLKEYVLDLYPEPT	YVLDLYPEP	Consensus (comb.lib./smm/nn)	2.13
HLA-DQA1*01:01/DQB1*05:01	9	23	15	KEYVLDLYPEPTDLY	YVLDLYPEP	Consensus (comb.lib./smm/nn)	2.13	HLA-DQA1*01:01/DQB1*05:01	9	23	15	KEYVLDLYPEPTDLY	YVLDLYPEP	Consensus (comb.lib./smm/nn)	2.13	HLA-DQA1*01:01/DQB1*05:01	9	23	15	KEYVLDLYPEPTDLY	YVLDLYPEP	Consensus (comb.lib./smm/nn)	2.13
HLA-DQA1*01:01/DQB1*05:01	10	24	15	EYVLDLYPEPTDLYC	YVLDLYPEP	Consensus (comb.lib./smm/nn)	2.13	HLA-DQA1*01:01/DQB1*05:01	10	24	15	EYVLDLYPEPTDLYC	YVLDLYPEP	Consensus (comb.lib./smm/nn)	2.13	HLA-DQA1*01:01/DQB1*05:01	10	24	15	EYVLDLYPEPTDLYC	YVLDLYPEP	Consensus (comb.lib./smm/nn)	2.13
HLA-DQA1*01:01/DQB1*02:01	7	21	15	TLKEYVLDLYPEPTD	YVLDLYPEP	NetMHCIIpan	2.16	HLA-DQA1*01:01/DQB1*02:01	7	21	15	TLKEYVLDLYPEPTD	YVLDLYPEP	NetMHCIIpan	2.16	HLA-DQA1*01:01/DQB1*02:01	7	21	15	TLKEYVLDLYPEPTD	YVLDLYPEP	NetMHCIIpan	2.16
HLA-DQA1*01:01/DQB1*02:01	5	19	15	KPTLKEYVLDLYPEP	LKEYVLDLY	NetMHCIIpan	2.37	HLA-DQA1*01:01/DQB1*02:01	5	19	15	KPTLKEYVLDLYPEP	LKEYVLDLY	NetMHCIIpan	2.37	HLA-DQA1*01:01/DQB1*02:01	5	19	15	KPTLKEYVLDLYPEP	LKEYVLDLY	NetMHCIIpan	2.37
HLA-DQA1*01:01/DQB1*02:01	8	22	15	LKEYVLDLYPEPTDL	YVLDLYPEP	NetMHCIIpan	2.42	HLA-DQA1*01:01/DQB1*02:01	8	22	15	LKEYVLDLYPEPTDL	YVLDLYPEP	NetMHCIIpan	2.42	HLA-DQA1*01:01/DQB1*02:01	8	22	15	LKEYVLDLYPEPTDL	YVLDLYPEP	NetMHCIIpan	2.42
HLA-DRB1*15:02	70	84	15	NSTASDLRTIQQLLM	LRTIQQLLM	sturniolo	2.45	HLA-DRB1*15:02	70	84	15	NSTASDLRTIQQLLM	LRTIQQLLM	sturniolo	2.45	HLA-DRB1*15:02	70	84	15	NSTASDLRTIQQLLM	LRTIQQLLM	sturniolo	2.45
HLA-DRB1*15:02	71	85	15	STASDLRTIQQLLMG	LRTIQQLLM	sturniolo	2.45	HLA-DRB1*15:02	71	85	15	STASDLRTIQQLLMG	LRTIQQLLM	sturniolo	2.45	HLA-DRB1*15:02	71	85	15	STASDLRTIQQLLMG	LRTIQQLLM	sturniolo	2.45
HLA-DRB1*15:02	72	86	15	TASDLRTIQQLLMGT	LRTIQQLLM	sturniolo	2.45	HLA-DRB1*15:02	72	86	15	TASDLRTIQQLLMGT	LRTIQQLLM	sturniolo	2.45	HLA-DRB1*15:02	72	86	15	TASDLRTIQQLLMGT	LRTIQQLLM	sturniolo	2.45
HLA-DRB1*15:02	73	87	15	ASDLRTIQQLLMGTV	LRTIQQLLM	sturniolo	2.45	HLA-DRB1*15:02	73	87	15	ASDLRTIQQLLMGTV	LRTIQQLLM	sturniolo	2.45	HLA-DRB1*15:02	73	87	15	ASDLRTIQQLLMGTV	LRTIQQLLM	sturniolo	2.45
HLA-DRB1*15:02	74	88	15	SDLRTIQQLLMGTVN	LRTIQQLLM	sturniolo	2.45	HLA-DRB1*15:02	74	88	15	SDLRTIQQLLMGTVN	LRTIQQLLM	sturniolo	2.45	HLA-DRB1*15:02	74	88	15	SDLRTIQQLLMGTVN	LRTIQQLLM	sturniolo	2.45
HLA-DRB1*15:02	75	89	15	DLRTIQQLLMGTVNI	LRTIQQLLM	sturniolo	2.45	HLA-DRB1*15:02	75	89	15	DLRTIQQLLMGTVNI	LRTIQQLLM	sturniolo	2.45	HLA-DRB1*15:02	75	89	15	DLRTIQQLLMGTVNI	LRTIQQLLM	sturniolo	2.45
HLA-DRB1*15:02	76	90	15	LRTIQQLLMGTVNIV	LRTIQQLLM	sturniolo	2.45	HLA-DRB1*15:02	76	90	15	LRTIQQLLMGTVNIV	LRTIQQLLM	sturniolo	2.45	HLA-DRB1*15:02	76	90	15	LRTIQQLLMGTVNIV	LRTIQQLLM	sturniolo	2.45
HLA-DQA1*01:01/DQB1*05:01	4	18	15	HKPTLKEYVLDLYPE	LKEYVLDLY	Consensus (comb.lib./smm/nn)	3.07	HLA-DQA1*01:01/DQB1*05:01	4	18	15	HKPTLKEYVLDLYPE	LKEYVLDLY	Consensus (comb.lib./smm/nn)	3.07	HLA-DQA1*01:01/DQB1*05:01	4	18	15	HKPTLKEYVLDLYPE	LKEYVLDLY	Consensus (comb.lib./smm/nn)	3.07
HLA-DQA1*01:01/DQB1*05:01	3	17	15	GHKPTLKEYVLDLYP	KEYVLDLYP	Consensus (comb.lib./smm/nn)	3.46	HLA-DQA1*01:01/DQB1*05:01	3	17	15	GHKPTLKEYVLDLYP	KEYVLDLYP	Consensus (comb.lib./smm/nn)	3.46	HLA-DQA1*01:01/DQB1*05:01	3	17	15	GHKPTLKEYVLDLYP	KEYVLDLYP	Consensus (comb.lib./smm/nn)	3.46
HLA-DQA1*01:01/DQB1*05:01	11	25	15	YVLDLYPEPTDLYCY	VLDLYPEPT	Consensus (comb.lib./smm/nn)	3.52	HLA-DQA1*01:01/DQB1*05:01	11	25	15	YVLDLYPEPTDLYCY	VLDLYPEPT	Consensus (comb.lib./smm/nn)	3.52	HLA-DQA1*01:01/DQB1*05:01	11	25	15	YVLDLYPEPTDLYCY	VLDLYPEPT	Consensus (comb.lib./smm/nn)	3.52
HLA-DQA1*01:01/DQB1*02:01	9	23	15	KEYVLDLYPEPTDLY	YVLDLYPEP	NetMHCIIpan	3.83	HLA-DQA1*01:01/DQB1*02:01	9	23	15	KEYVLDLYPEPTDLY	YVLDLYPEP	NetMHCIIpan	3.83	HLA-DQA1*01:01/DQB1*02:01	9	23	15	KEYVLDLYPEPTDLY	YVLDLYPEP	NetMHCIIpan	3.83
HLA-DRB1*15:02	46	60	15	QPATADYYIVTCCHT	YYIVTCCHT	sturniolo	4.22	HLA-DRB1*15:02	46	60	15	QPATADYYIVTCCHT	YYIVTCCHT	sturniolo	4.22	HLA-DRB1*15:02	46	60	15	QPATADYYIVTCCHT	YYIVTCCHT	sturniolo	4.22
HLA-DRB1*15:02	47	61	15	PATADYYIVTCCHTC	YYIVTCCHT	sturniolo	4.22	HLA-DRB1*15:02	47	61	15	PATADYYIVTCCHTC	YYIVTCCHT	sturniolo	4.22	HLA-DRB1*15:02	47	61	15	PATADYYIVTCCHTC	YYIVTCCHT	sturniolo	4.22
HLA-DRB1*15:02	48	62	15	ATADYYIVTCCHTCN	YYIVTCCHT	sturniolo	4.22	HLA-DRB1*15:02	48	62	15	ATADYYIVTCCHTCN	YYIVTCCHT	sturniolo	4.22	HLA-DRB1*15:02	48	62	15	ATADYYIVTCCHTCN	YYIVTCCHT	sturniolo	4.22
HLA-DRB1*15:02	49	63	15	TADYYIVTCCHTCNT	YYIVTCCHT	sturniolo	4.22	HLA-DRB1*15:02	49	63	15	TADYYIVTCCHTCNT	YYIVTCCHT	sturniolo	4.22	HLA-DRB1*15:02	49	63	15	TADYYIVTCCHTCNT	YYIVTCCHT	sturniolo	4.22
HLA-DRB1*15:02	50	64	15	ADYYIVTCCHTCNTT	YYIVTCCHT	sturniolo	4.22	HLA-DRB1*15:02	50	64	15	ADYYIVTCCHTCNTT	YYIVTCCHT	sturniolo	4.22	HLA-DRB1*15:02	50	64	15	ADYYIVTCCHTCNTT	YYIVTCCHT	sturniolo	4.22
HLA-DRB1*15:02	51	65	15	DYYIVTCCHTCNTTV	YYIVTCCHT	sturniolo	4.22	HLA-DRB1*15:02	51	65	15	DYYIVTCCHTCNTTV	YYIVTCCHT	sturniolo	4.22	HLA-DRB1*15:02	51	65	15	DYYIVTCCHTCNTTV	YYIVTCCHT	sturniolo	4.22
HLA-DRB1*15:02	52	66	15	YYIVTCCHTCNTTVR	YYIVTCCHT	sturniolo	4.22	HLA-DRB1*15:02	52	66	15	YYIVTCCHTCNTTVR	YYIVTCCHT	sturniolo	4.22	HLA-DRB1*15:02	52	66	15	YYIVTCCHTCNTTVR	YYIVTCCHT	sturniolo	4.22
HLA-DQA1*01:01/DQB1*02:01	4	18	15	HKPTLKEYVLDLYPE	LKEYVLDLY	NetMHCIIpan	4.39	HLA-DQA1*01:01/DQB1*02:01	4	18	15	HKPTLKEYVLDLYPE	LKEYVLDLY	NetMHCIIpan	4.39	HLA-DQA1*01:01/DQB1*02:01	4	18	15	HKPTLKEYVLDLYPE	LKEYVLDLY	NetMHCIIpan	4.39
HLA-DRB1*15:02	5	19	15	KPTLKEYVLDLYPEP	YVLDLYPEP	sturniolo	4.59	HLA-DRB1*15:02	5	19	15	KPTLKEYVLDLYPEP	YVLDLYPEP	sturniolo	4.59	HLA-DRB1*15:02	5	19	15	KPTLKEYVLDLYPEP	YVLDLYPEP	sturniolo	4.59
HLA-DRB1*15:02	6	20	15	PTLKEYVLDLYPEPT	YVLDLYPEP	sturniolo	4.59	HLA-DRB1*15:02	6	20	15	PTLKEYVLDLYPEPT	YVLDLYPEP	sturniolo	4.59	HLA-DRB1*15:02	6	20	15	PTLKEYVLDLYPEPT	YVLDLYPEP	sturniolo	4.59
HLA-DRB1*15:02	7	21	15	TLKEYVLDLYPEPTD	YVLDLYPEP	sturniolo	4.59	HLA-DRB1*15:02	7	21	15	TLKEYVLDLYPEPTD	YVLDLYPEP	sturniolo	4.59	HLA-DRB1*15:02	7	21	15	TLKEYVLDLYPEPTD	YVLDLYPEP	sturniolo	4.59
HLA-DRB1*15:02	8	22	15	LKEYVLDLYPEPTDL	YVLDLYPEP	sturniolo	4.59	HLA-DRB1*15:02	8	22	15	LKEYVLDLYPEPTDL	YVLDLYPEP	sturniolo	4.59	HLA-DRB1*15:02	8	22	15	LKEYVLDLYPEPTDL	YVLDLYPEP	sturniolo	4.59
HLA-DRB1*15:02	9	23	15	KEYVLDLYPEPTDLY	YVLDLYPEP	sturniolo	4.59	HLA-DRB1*15:02	9	23	15	KEYVLDLYPEPTDLY	YVLDLYPEP	sturniolo	4.59	HLA-DRB1*15:02	9	23	15	KEYVLDLYPEPTDLY	YVLDLYPEP	sturniolo	4.59
HLA-DRB1*15:02	10	24	15	EYVLDLYPEPTDLYC	YVLDLYPEP	sturniolo	4.59	HLA-DRB1*15:02	10	24	15	EYVLDLYPEPTDLYC	YVLDLYPEP	sturniolo	4.59	HLA-DRB1*15:02	10	24	15	EYVLDLYPEPTDLYC	YVLDLYPEP	sturniolo	4.59
HLA-DRB1*15:02	11	25	15	YVLDLYPEPTDLYCY	YVLDLYPEP	sturniolo	4.59	HLA-DRB1*15:02	11	25	15	YVLDLYPEPTDLYCY	YVLDLYPEP	sturniolo	4.59	HLA-DRB1*15:02	11	25	15	YVLDLYPEPTDLYCY	YVLDLYPEP	sturniolo	4.59
HLA-DRB1*15:02	77	91	15	RTIQQLLMGTVNIVC	LMGTVNIVC	sturniolo	4.98	HLA-DRB1*15:02	77	91	15	RTIQQLLMGTVNIVC	LMGTVNIVC	sturniolo	4.98	HLA-DRB1*15:02	77	91	15	RTIQQLLMGTVNIVC	LMGTVNIVC	sturniolo	4.98
HLA-DRB1*15:02	78	92	15	TIQQLLMGTVNIVCP	LMGTVNIVC	sturniolo	4.98	HLA-DRB1*15:02	78	92	15	TIQQLLMGTVNIVCP	LMGTVNIVC	sturniolo	4.98	HLA-DRB1*15:02	78	92	15	TIQQLLMGTVNIVCP	LMGTVNIVC	sturniolo	4.98
HLA-DRB1*15:02	79	93	15	IQQLLMGTVNIVCPT	LMGTVNIVC	sturniolo	4.98	HLA-DRB1*15:02	79	93	15	IQQLLMGTVNIVCPT	LMGTVNIVC	sturniolo	4.98	HLA-DRB1*15:02	79	93	15	IQQLLMGTVNIVCPT	LMGTVNIVC	sturniolo	4.98
HLA-DRB1*15:02	80	94	15	QQLLMGTVNIVCPTC	LMGTVNIVC	sturniolo	4.98	HLA-DRB1*15:02	80	94	15	QQLLMGTVNIVCPTC	LMGTVNIVC	sturniolo	4.98	HLA-DRB1*15:02	80	94	15	QQLLMGTVNIVCPTC	LMGTVNIVC	sturniolo	4.98
HLA-DRB1*15:02	81	95	15	QLLMGTVNIVCPTCA	LMGTVNIVC	sturniolo	4.98	HLA-DRB1*15:02	81	95	15	QLLMGTVNIVCPTCA	LMGTVNIVC	sturniolo	4.98	HLA-DRB1*15:02	81	95	15	QLLMGTVNIVCPTCA	LMGTVNIVC	sturniolo	4.98
HLA-DRB1*15:02	82	96	15	LLMGTVNIVCPTCAQ	LMGTVNIVC	sturniolo	4.98	HLA-DRB1*15:02	82	96	15	LLMGTVNIVCPTCAQ	LMGTVNIVC	sturniolo	4.98	HLA-DRB1*15:02	82	96	15	LLMGTVNIVCPTCAQ	LMGTVNIVC	sturniolo	4.98
HLA-DRB1*15:02	83	97	15	LMGTVNIVCPTCAQQ	LMGTVNIVC	sturniolo	4.98	HLA-DRB1*15:02	83	97	15	LMGTVNIVCPTCAQL	LMGTVNIVC	sturniolo	4.98	HLA-DRB1*15:02	83	97	15	LMGTVNIVCPTCAQL	LMGTVNIVC	sturniolo	4.98
